# Supplementary material for: Task model-specific operator skill assessment in routine fetal ultrasound scanning
Source: Springer Nature journal article supplement (doi:10.1007/s11548-022-02642-y), 2022-05-12
Supplement: MOESM1 [file 11548_2022_2642_MOESM1_ESM.pdf]

# Supplementary Materials for Task Model-Specific Operator Skill Assessment in Routine Fetal Ultrasound Scanning

Yipei Wang<sup>1\*</sup>, Qianye Yang<sup>2</sup>, Lior Drukker<sup>3</sup>, Aris Papageorghiou<sup>3</sup>, Yipeng Hu<sup>1,2</sup> and J. Alison Noble<sup>1</sup>

<sup>1\*</sup>Institute of Biomedical Engineering, Department of Engineering Science, University of Oxford, Oxford, UK.

<sup>2</sup>Department of Medical Physics and Biomedical Engineering, University College London, London, UK.

<sup>3</sup>Nuffield Department of Women's & Reproductive Health, University of Oxford, Oxford, UK.

\*Corresponding author(s). E-mail(s): [yipei.wang@eng.ox.ac.uk](mailto:yipei.wang@eng.ox.ac.uk);

**Table 1** Summary of data contribution from the 11 sonographers (S1-S11) used in this study. HC=head circumference, AC=abdominal circumference.

| Sonographer |         | S1    | S2   | S3   | S4  | S5  | S6   | S7   | S8  | S9   | S10  | S11 | Sum   |
|-------------|---------|-------|------|------|-----|-----|------|------|-----|------|------|-----|-------|
| HC          | #Clips  | 83    | 11   | 5    | 2   | 1   | 3    | 3    | 1   | 8    | 28   | 1   | 146   |
|             | #Frames | 26211 | 3237 | 1529 | 568 | 212 | 990  | 1080 | 336 | 2376 | 9430 | 360 | 46329 |
| AC          | #Clips  | 84    | 7    | 2    | 3   | 0   | 4    | 3    | 0   | 14   | 28   | 4   | 149   |
|             | #Frames | 27401 | 2022 | 561  | 930 | 0   | 1148 | 932  | 0   | 4394 | 9021 | 610 | 47019 |

2 *Supplementary Material***Table 2** Dataset partitioning used in the experiments. HC=head circumference, AC=abdominal circumference, S1-S11 are the 11 sonographers.

| Task | Dataset | Development set |    |        |     |     | Test set |    |    |    |        |    |     |    |
|------|---------|-----------------|----|--------|-----|-----|----------|----|----|----|--------|----|-----|----|
|      |         | Operator        |    | #Clips |     |     | Operator |    |    |    | #Clips |    |     |    |
| HC   | A       | S1              | S2 | S9     | S10 | 130 | S3       | S4 | S5 | S6 | S7     | S8 | S11 | 16 |
|      | B       | S2              | S6 | S9     | S10 | 50  | S1       | S3 | S4 | S5 | S7     | S8 | S11 | 96 |
| AC   | C       | S1              | S3 | S9     | S10 | 128 | S2       | S4 | S6 | S7 | S11    | -  | -   | 21 |
|      | D       | S2              | S3 | S9     | S10 | 51  | S1       | S3 | S4 | S6 | S7     | -  | -   | 98 |

**Table 3** Ablation study results for different network architectures at  $\delta_{min}=0.04$ .

| Criterion         | $\delta_{min}$ | Model       | RMSE         | PCC          | Criterion         | $\delta_{min}$ | Model       | RMSE        | PCC         |
|-------------------|----------------|-------------|--------------|--------------|-------------------|----------------|-------------|-------------|-------------|
| $f_{skill}^{acc}$ | 0.01           | VGG16       | 0.380±0.132  | 0.711±0.366  | $f_{skill}^{pos}$ | 0.01           | VGG16       | 0.246±0.065 | 0.759±0.188 |
|                   |                | ResNet18    | 0.391±0.132  | 0.498±0.276  |                   |                | ResNet18    | 0.167±0.036 | 0.886±0.202 |
|                   | 0.02           | VGG16       | 0.328±0.159  | 0.459±0.397  |                   | 0.02           | VGG16       | 0.229±0.090 | 0.510±0.183 |
|                   |                | ResNet18    | 0.305±0.169  | 0.328±0.447  |                   |                | ResNet18    | 0.247±0.073 | 0.611±0.231 |
|                   | 0.03           | VGG16       | 0.341±0.239  | -0.033±0.247 |                   | 0.03           | VGG16       | 0.206±0.063 | 0.630±0.326 |
|                   |                | ResNet18    | 0.335±0.249  | 0.141±0.229  |                   |                | ResNet18    | 0.245±0.076 | 0.513±0.316 |
| 0.04              | VGG16          | 0.164±0.189 | -0.176±0.200 | 0.04         | VGG16             | 0.171±0.116    | 0.212±0.257 |             |             |
|                   | ResNet18       | 0.164±0.196 | -0.450±0.246 |              | ResNet18          | 0.119±0.063    | 0.773±0.304 |             |             |

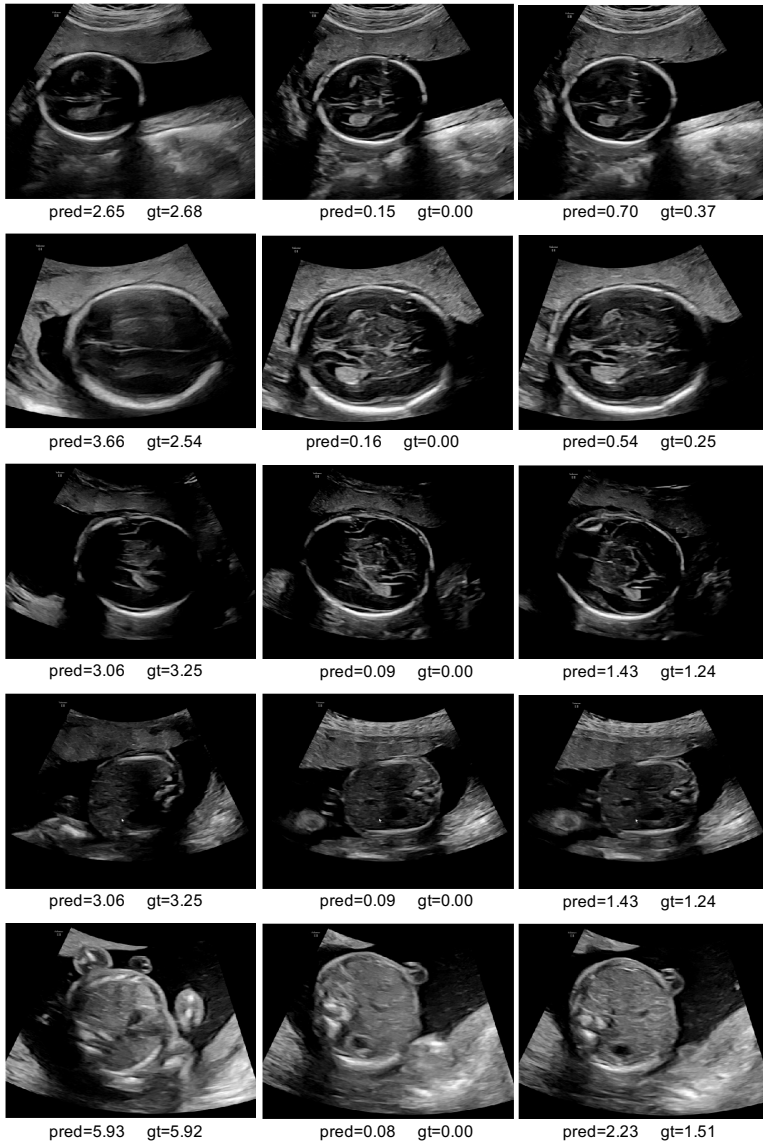

**Fig. 1** Visual results of the mixed label generator  $f_{linear}$  performance. All images in the same row are from the same scanning sequence and, for reference, the middle images are the diagnostic planes selected by sonographers. Both the predicted percentage relative error  $\hat{\delta}$  and the ground-truth percentage error  $\delta$  are presented.

4 *Supplementary Material*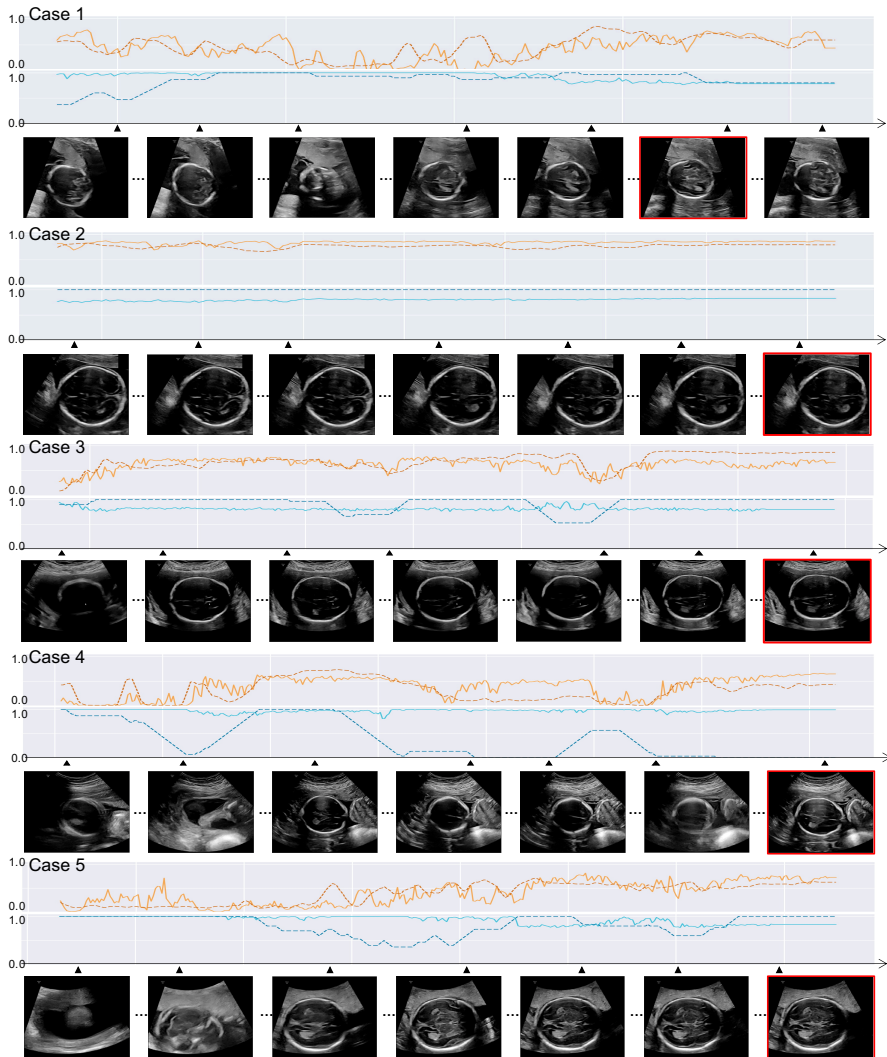

**Fig. 2** Additional cases complementing the Section 4.4 and Figure 2 in the main paper.  $f_{skill}^{pos}$  and  $f_{skill}^{acc}$  are plotted in orange and blue, respectively, with both task model-generated scores and the predicted scores in dotted and solid lines, respectively. The red boxed frames were the manually identified standard planes.
